# Supplementary material for: Ghrelin Causes a Decline in GABA Release by Reducing Fatty Acid Oxidation in Cortex
Source: PubMed Central journal article supplement (PMC6096967; doi:10.1007/s12035-018-0921-3), 2018-02-02
Supplement: 12035_2018_921_MOESM1_ESM.pdf [file 12035_2018_921_MOESM1_ESM.pdf]

## **Ghrelin causes a decline in GABA release by reducing fatty acid oxidation in ortex**

Joan Francesc Mir<sup>a,b</sup>, Sebastián Zagmutt<sup>a</sup>, Mathieu P Lichtenstein<sup>c</sup>, Judit García-Villoria<sup>d</sup>, Minéia Weber<sup>a</sup>, Ana Gracia<sup>b,e</sup>, Gemma Fabriàs<sup>f</sup> Josefina Casas<sup>f</sup>, Miguel López<sup>gh</sup>, Núria Casals<sup>i,b</sup>, Antònia Ribes<sup>d</sup>, Cristina Suñol<sup>c</sup>, Laura Herrero<sup>a,b</sup>, Dolors Serra<sup>ab\*</sup>

<sup>a</sup>Department of Biochemistry and Physiology, Facultat de Farmàcia i Ciències de l'Alimentació and Institut de Biomedicina de la Universitat de Barcelona (IBUB), Universitat de Barcelona, E-08028 Barcelona, Spain

<sup>b</sup>Centro de Investigación Biomédica en Red de Fisiopatología de la Obesidad y la Nutrición (CIBEROBN), Instituto de Salud Carlos III, E-28029 Madrid, Spain

<sup>c</sup>Institut d'Investigacions Biomèdiques de Barcelona, Centro de Investigación Biomédica en Red de Epidemiología y Salud Pública (CIBERESP), Barcelona, Spain

<sup>d</sup>Sección de Errores Congénitos del Metabolismo – IBC, Servicio de Bioquímica y Genética Molecular, Hospital Clínic, IDIBAPS, Centro de Investigación Biomédica en Red de Enfermedades Raras (CIBERER), Barcelona, Spain

<sup>e</sup>Nutrition and Food Science Area, School of Pharmacy, Universidad del País Vasco/Euskal Herriko Unibersitatea, Leioa, Spain

<sup>f</sup>Research Unit on BioActive Molecules, Department of Biomedical Chemistry, Institute of Advanced Chemistry of Catalonia (IQAC)/CSIC, Barcelona, Spain

<sup>g</sup>NeurObesity Group, Department of Physiology, CIMUS, University of Santiago de Compostela-Instituto de Investigación Sanitaria, Santiago de Compostela, 15782, Spain

<sup>h</sup>Departament de Ciències Bàsiques, Facultat de Medicina i Ciències de la Salut, Universitat Internacional de Catalunya (UIC), Barcelona, Spain

\*Corresponding authors:

E-mail addresses: [dserra@ub.edu](mailto:dserra@ub.edu)

**Dolors Serra, PhD**

Department of Biochemistry and Physiology, IBUB

School of Pharmacy

Universitat de Barcelona

Av. Joan XXIII, 27-30

E-08028 Barcelona, Spain

Tel: (+34) 934 024 522

ORCID: 0000-0002-4936-4206

**Supplemental Figure 1. Scheme of the obtention of CPT1A<sup>(loxP/loxP)</sup> mice.** CPT1A<sup>(+/frit-loxP)</sup> mice containing the CPT1A conditional expression cassette were crossbred with C57BL6/J Flp-frit recombinase-expressing mice to eliminate the frit-*lacZ* cassette and obtain CPT1A<sup>(+/loxP)</sup> mice. FRT: target sequences for FLP recombinase are in green; Exon Del: internal exon deletion; IRES: internal ribosome entry site; LacZ:  $\beta$ -galactosidase gene; pA: polyadenylation site; loxp: target sequence for CRE recombinase; hBactP: human  $\beta$ -actin promoter; NEO: neomycine resistance gene.

**Supplemental Figure 2. ddPCR analysis of CPT1A conditional expression cassette copy number inserted into the genome of CPT1A<sup>(+/frit-loxP)</sup> mice.** (a) Two CPT1A<sup>(+/frit-loxP)</sup> mice K462 and K465 and one wt mice were screened by ddPCR for the control gene *tert* and the *lacZ*. (b) ddPCR quantification. (c) Electrophoretic analysis of the cDNA amplifications of the CPT1A mRNA levels in Cre-infected or GFP-infected primary cortical neurons for 24 and 48 h.

**Supplemental Figure 3. Analysis of the mRNA levels of GABA metabolism genes in the primary cortical neurons with deleted CPT1A.** Primary cortical neurons infected with Ad-CRE recombinase (CRE) or ad-GFP were treated with ghrelin (black bars) or without ghrelin (white bars). (a-c) Relative mRNA levels of GABA metabolism genes were analysed by qPCR. Results are represented as mean + SEM. n=4-6; \* p < 0.05, \*\* p < 0.01 respect to the Ad-GFP control.

Supplemental Fig1

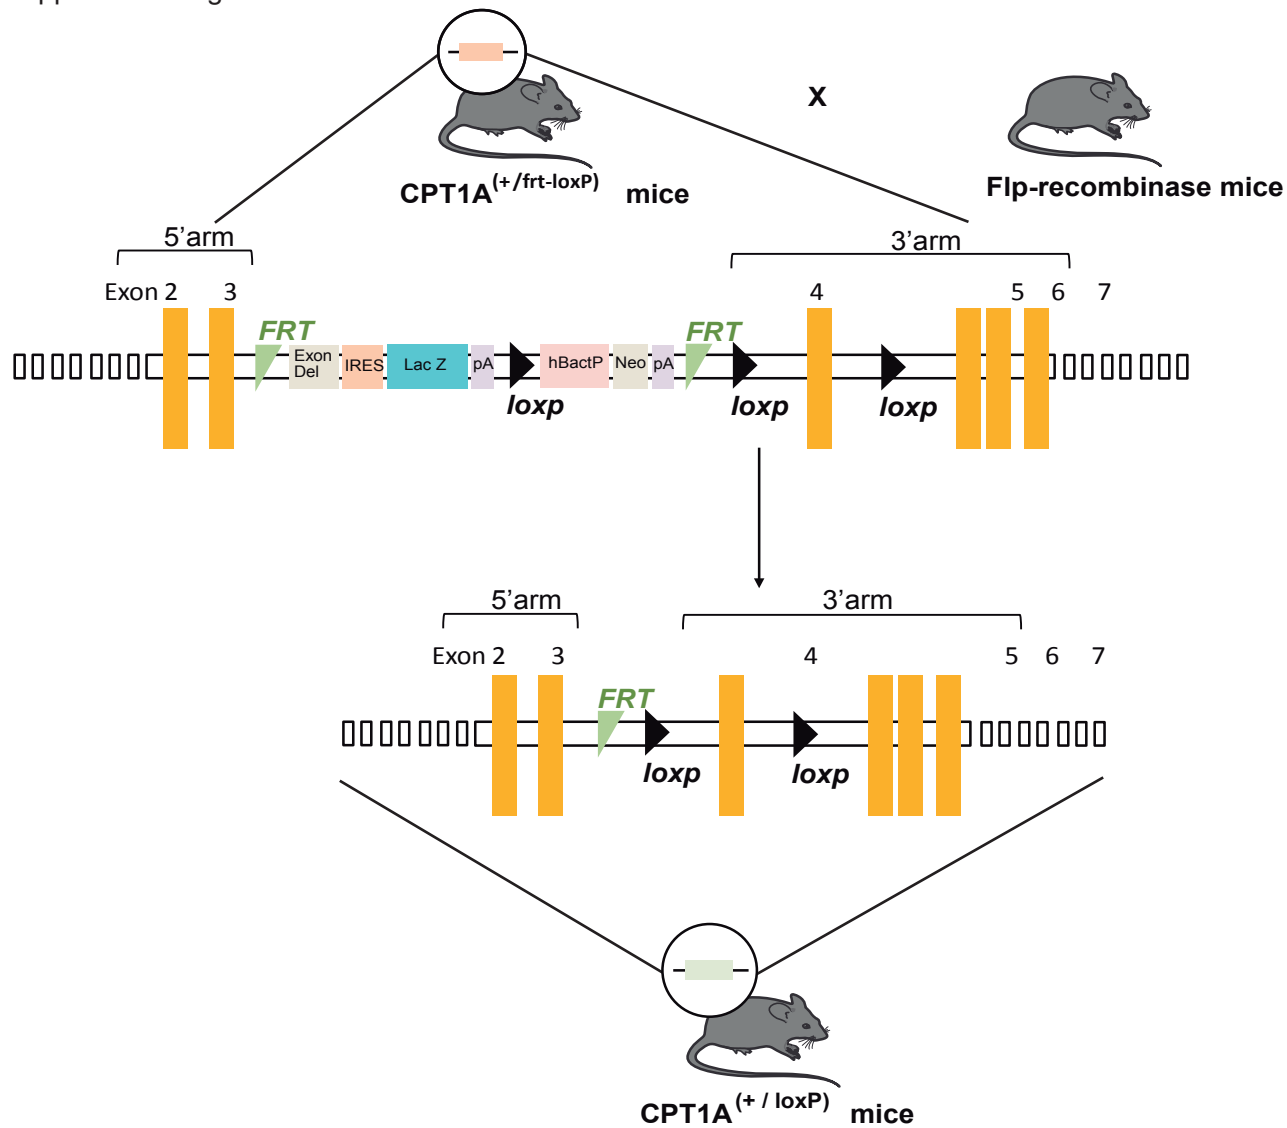

Supplemental Fig2

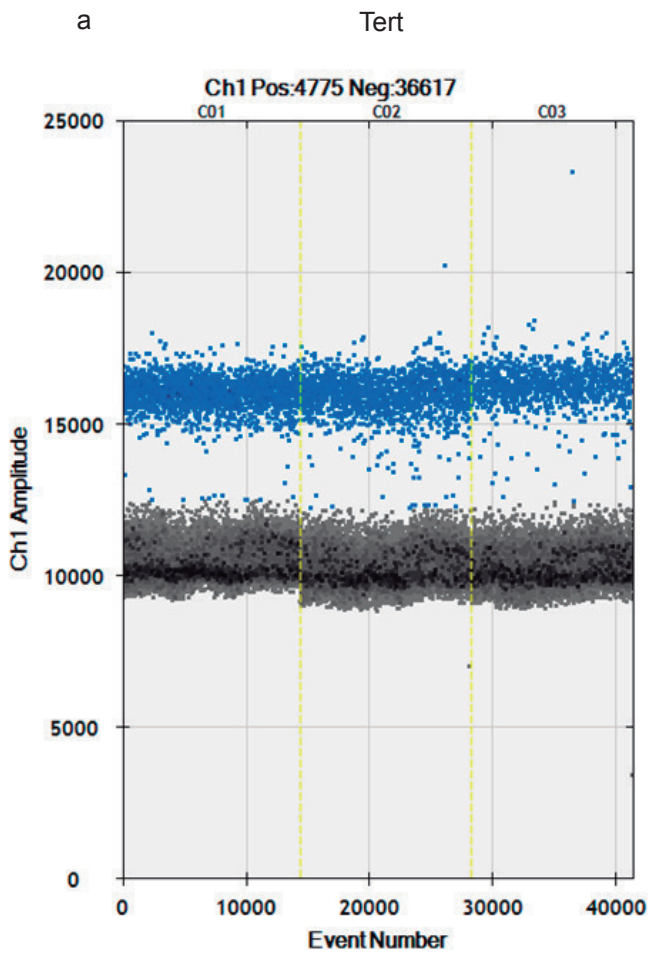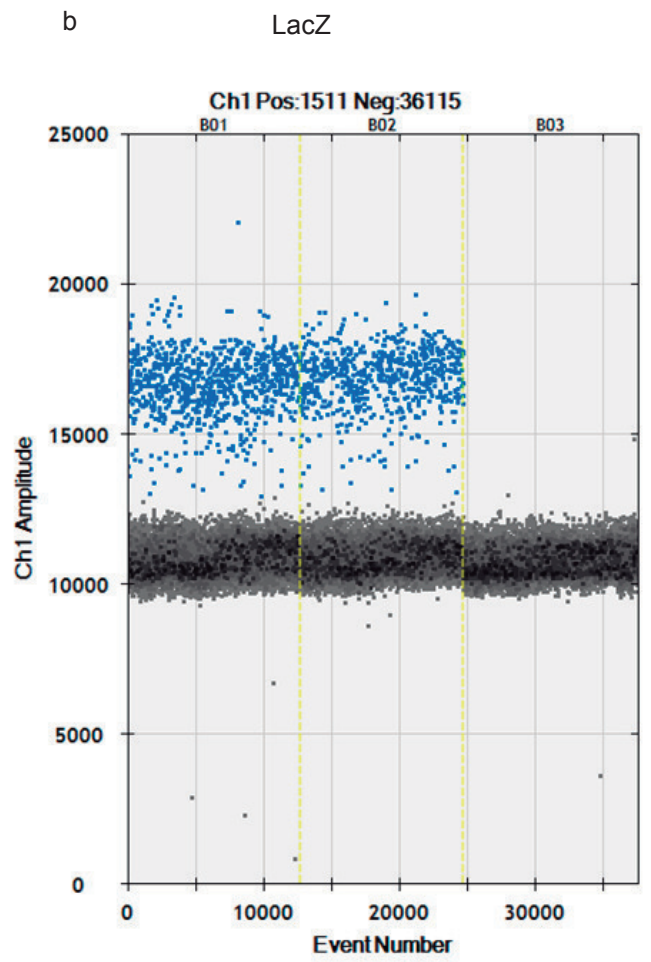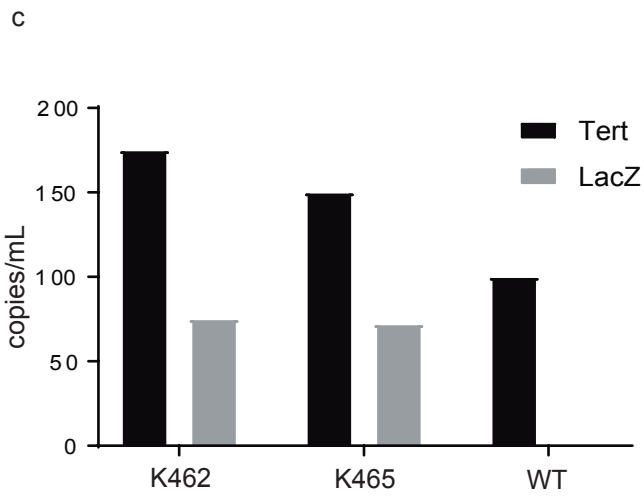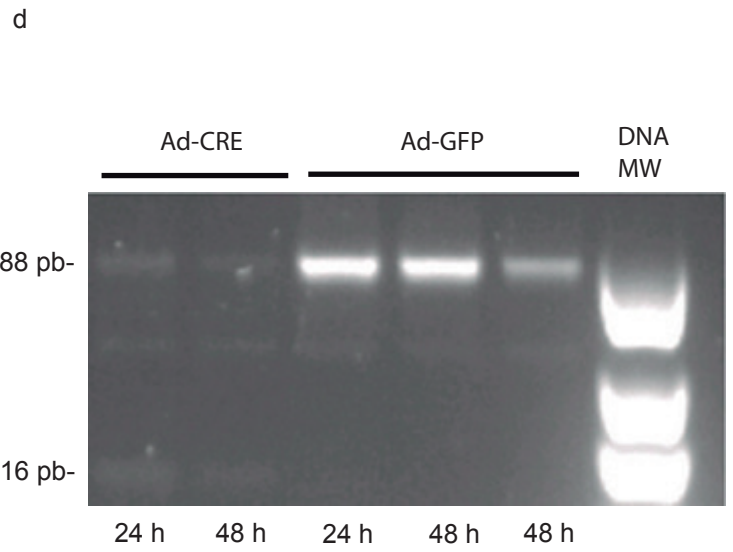

# Supplemental Fig3

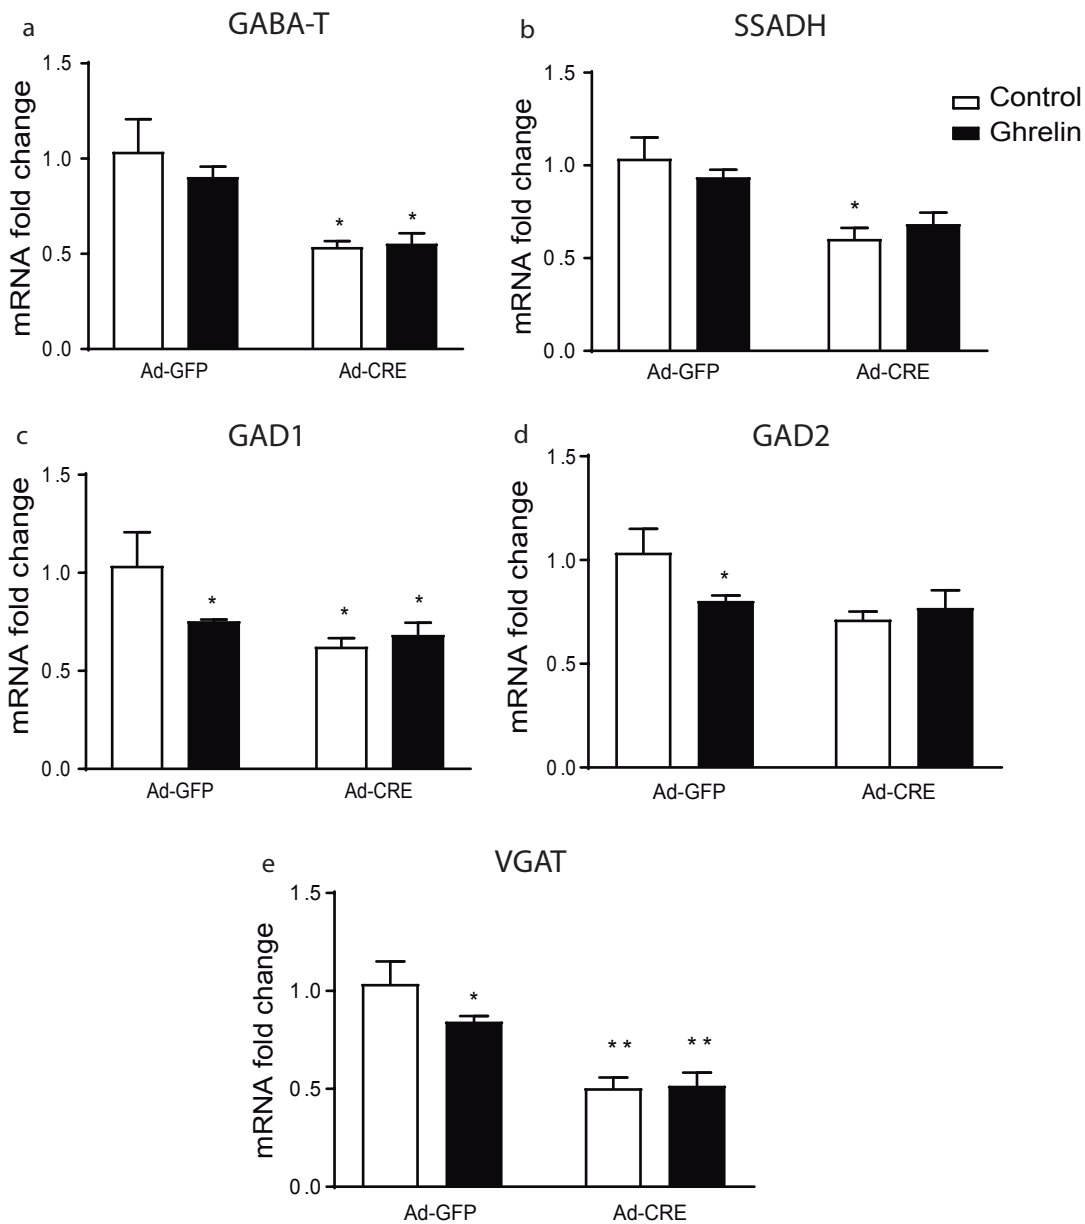

**Supplemental table1:****Primers for qRT-PCR detection and relative quantification of genes in mouse**

| GENE              | SEQUENCE                       |
|-------------------|--------------------------------|
| <i>CPT1A for</i>  | 5'- GACTCCGCTCGCTCATT          |
| <i>CPT1A rev</i>  | 5'- AAGGCCACAGCTTGGTGA         |
| <i>AgRP for</i>   | 5'- TGCAGACCGAGCAGAAGAAG       |
| <i>AgRP rev</i>   | 5'- GACTCGTGCAGCCTTACACA       |
| <i>VGLUT1 for</i> | 5'- AAAAGCAGCAGCCAAGGTT        |
| <i>VGLUT1 rev</i> | 5'- CGCAGTTTAGCATTTCAGGAC      |
| <i>VGLUT2 for</i> | 5'- CTGGGGTCTTGTGCAGTAT        |
| <i>VGLUT2 rev</i> | 5'- CCGAAGCTGCCATAGACATAG      |
| <i>VGLUT3 for</i> | 5'- TAAGGAGTAGCATGTTGCTCAAA    |
| <i>VGLUT3 rev</i> | 5'- GGCAACCACCATGACTCTTCT      |
| <i>VGAT for</i>   | 5'- GGCAACCACCATGACTCTTCT      |
| <i>VGAT rev</i>   | 5'- TGAGGAACAACCCAGGTAG        |
| <i>GAD1 for</i>   | 5'-ATACAACCTTTGGCTGCATGT       |
| <i>GAD1 rev</i>   | 5'-TTCCGGGACATGAGCAGT          |
| <i>GAD2 for</i>   | 5'-ACTAAAGAAAATGAGAGAAATCATTGG |
| <i>GAD2 rev</i>   | 5'-AGCATGGCATAACATGTTGGA       |
| <i>GABAT for</i>  | 5'-TGCTCCAGAGAACTTTGTG         |
| <i>GABAT rev</i>  | 5'-TGATGAGCTGGGACATGC          |
| <i>SSADH for</i>  | 5'-AACAGCTGGAAAGGGTCTC         |
| <i>SSADH rev</i>  | 5'-CATTAAAGTCGTACCATTTACGGAGT  |
